# Supplementary material for: Selective placement of functionalised DNA origami via thermal scanning probe lithography patterning
Source: Royal Society of Chemistry journal article supplement (doi:10.1039/d4ma00828f), 2024-01-01
Supplement: d4ma00828f1.pdf [file d4ma00828f1.pdf]

Supporting Information

**Selective Placement of Functionalised DNA Origami via Thermal Scanning Probe  
Lithography Patterning**

Tingting Zheng <sup>a</sup>, Caoimhe O'Neill <sup>b</sup>, John F. Marshall <sup>c</sup>, Thomas Iskratsch <sup>b, \*</sup>, Matteo Palma <sup>a, \*</sup>

<sup>a</sup> Department of Chemistry, Queen Mary University of London, Mile End Road, London E1 4NS, United Kingdom.

<sup>b</sup> School of Engineering and Materials Science, Queen Mary University of London, Mile End Road, London E1 4NS, United Kingdom.

<sup>c</sup> Barts Cancer Institute, Cancer Research UK Centre of Excellence, Queen Mary University of London, Charterhouse Square, London EC1M 6BQ, United Kingdom

\* [t.iskratsch@qmul.ac.uk](mailto:t.iskratsch@qmul.ac.uk)

\* [m.palma@qmul.ac.uk](mailto:m.palma@qmul.ac.uk)

## DNA sequences tables:

### 1. List of unmodified staple strands

|     |                                             |
|-----|---------------------------------------------|
| A01 | CGGGGTTTCCTCAAGAGAAGGATTTTGAATTA            |
| A02 | AGCGTCATGTCTCTGAATTTACCGACTACCTT            |
| A03 | TTCATAATCCCCTTATTAGCGTTTTTCTTACC            |
| A04 | ATGGTTTATGTCACAATCAATAGATATTAAC             |
| A05 | TTTGATGATTAAGAGGCTGAGACTTGCTCAGTACCAGGCG    |
| A06 | CCGGAACCCAGAATGGAAAGCGCAACATGGCT            |
| A07 | AAAGACAACATTTTCGGTCATAGCCAAAATCA            |
| A08 | GACGGGAGAATTAACCTCGGAATAAGTTTATTTCCAGCGCC   |
| A09 | GATAAGTGCCGTCGAGCTGAAACATGAAAGTATACAGGAG    |
| A10 | TGTA CTGGAAATCCTCATTAAAGCAGAGCCAC           |
| A11 | CACCGGAAAGCGCGTTTTTCATCGGAAGGGCGA           |
| A12 | CATTCAACAAACGCAAAGACACCAGAACACCCTGAACAAA    |
| A13 | TTTAACGGTTCGGAACCTATTATTAGGGTTGATATAAGTA    |
| A14 | CTCAGAGCATATTCACAAACAATTAATAAGT             |
| A15 | GGAGGGAATTTAGCGTCAGACTGTCCGCCTCC            |
| A16 | GTCAGAGGGTAATTGATGGCAACATATAAAAGCGATTGAG    |
| A17 | TAGCCCGGAATAGGTGAATGCCCCCTGCCTATGGTCAGTG    |
| A18 | CCTTGAGTCAGACGATTGGCCTTGCGCCACCC            |
| A19 | TCAGAACCCAGAATCAAGTTTGCCGGTAAATA            |
| A20 | TTGACGGAAATACATACATAAAGGGCGCTAATATCAGAGA    |
| A21 | CAGAGCCAGGAGGTTGAGGCAGGTAACAGTGCCCG         |
| A22 | ATTAAAGGCCGTAATCAGTAGCGAGCCACCCT            |
| A23 | GATAACCCACAAGAATGTTAGCAAACGTAGAAAATTATTC    |
| A24 | GCCGCCAGCATTGACACCACCCTC                    |
| A25 | AGAGCCGCACCATCGATAGCAGCATGAATTAT            |
| A26 | CACCGTCACCTTATTACGCAGTATTGAGTTAAGCCCAATA    |
| A27 | AGCCATTTAAACGTCACCAATGAACACCAGAACCA         |
| A28 | ATAAGAGCAAGAAACATGGCATGATTAAGACTCCGACTTG    |
| A29 | CCATTAGCAAGGCCGGGGGAATTA                    |
| A30 | GAGCCAGCGAATACCCAAAAGAACATGAAATAGCAATAGC    |
| A31 | TATCTTACCGAAGCCCAAACGCAATAATAACGAAAATCACCAG |
| A32 | CAGAAGGAAACCGAGGTTTTTAAGAAAAGTAAGCAGATAGCCG |
| A33 | CCTTTTTTCATTTAACAATTCATAGGATTAG             |
| A34 | TTTAACCTATCATAGGTCTGAGAGTTCCAGTA            |
| A35 | AGTATAAAATATGCGTTATACAAAGCCATCTT            |
| A36 | CAAGTACCTCATTCCAAGAACGGGAAATTCAT            |
| A37 | AGAGAATAACATAAAAACAGGGAAAGCGCATT            |
| A38 | AAAACAAAATTAATTAATGGAAACAGTACATTAGTGAAT     |
| A39 | TTATCAAACCGGCTTAGGTTGGGTAAGCCTGT            |
| A40 | TTAGTATCGCCAACGCTCAACAGTCGGCTGTC            |
| A41 | TTTCCTTAGCACTCATCGAGAACAATAGCAGCCTTTACAG    |
| A42 | AGAGTCAAAAATCAATATATGTGATGAAACAAACATCAAG    |
| A43 | ACTAGAAATATATAACTATATGTACGCTGAGA            |
| A44 | TCAATAATAGGGCTTAATTGAGAATCATAATT            |

|     |                                             |
|-----|---------------------------------------------|
| A45 | AACGTCAAAAATGAAAAGCAAGCCGTTTTTATGAAACCAA    |
| A46 | GAGCAAAAGAAGATGAGTGAATAACCTTGCTTATAGCTTA    |
| A47 | GATTAAGAAATGCTGATGCAAATCAGAATAAA            |
| A48 | CACCGGAATCGCCATATTTAACAAAATTTACG            |
| A49 | AGCATGTATTTTCATCGTAGGAATCAAACGATTTTTTGTTT   |
| A50 | ACATAGCGCTGTAAATCGTCGCTATTCATTTCAATTACCT    |
| A51 | GTTAAATACAATCGCAAGACAAAGCCTTGAAA            |
| A52 | CCCATCCTCGCCAACATGTAATTTAATAAGGC            |
| A53 | TCCCAATCCAAATAAGATTACCGCGCCCAATAAATAATAT    |
| A54 | TCCCTTAGAATAACGCGAGAAAACCTTTTACCGACC        |
| A55 | GTGTGATAAGGCAGAGGCATTTTCAGTCCTGA            |
| A56 | ACAAGAAAGCAAGCAAATCAGATAACAGCCATATTATTTA    |
| A57 | GTTTGAAATTCAAATATATTTTAG                    |
| A58 | AATAGATAGAGCCAGTAATAAGAGATTTAATG            |
| A59 | GCCAGTTACAAAATAATAGAAGGCTTATCCGGTTATCAAC    |
| A60 | TTCTGACCTAAAATATAAAGTACCGACTGCAGAAC         |
| A61 | GCGCCTGTTATTCTAAGAACGCGATTCCAGAGCCTAATTT    |
| A62 | TCAGCTAAAAAAGGTAAAGTAATT                    |
| A63 | ACGCTAACGAGCGTCTGGCGTTTTAGCGAACCCAACATGT    |
| A64 | ACGACAATAAATCCCGACTTGCGGGAGATCCTGAATCTTACCA |
| A65 | TGCTATTTTGCACCCAGCTACAATTTTGTTTTGAAGCCTTAAA |
| B01 | TCATATGTGTAATCGTAAACTAGTCATTTTC             |
| B02 | GTGAGAAAATGTGTAGGTAAAGATAACAACCTT           |
| B03 | GGCATCAAATTTGGGGCGCGAGCTAGTTAAAG            |
| B04 | TTCGAGCTAAGACTTCAAATATCGGGAACGAG            |
| B05 | ACAGTCAAAGAGAATCGATGAACGACCCCGGTTGATAATC    |
| B06 | ATAGTAGTATGCAATGCCTGAGTAGGCCGGAG            |
| B07 | AACCAGACGTTTAGCTATATTTTCTTCTACTA            |
| B08 | GAATACCACATTCAACTTAAGAGGAAGCCCGATCAAAGCG    |
| B09 | AGAAAAGCCCCAAAAAGAGTCTGGAGCAAACAATCACCAT    |
| B10 | CAATATGACCCTCATATATTTTAAAGCATTAA            |
| B11 | CATCCAATAAATGGTCAATAACCTCGGAAGCA            |
| B12 | AACTCCAAGATTGCATCAAAAAGATAATGCAGATACATAA    |
| B13 | CGTTCTAGTCAGGTCATTGCCTGACAGGAAGATTGTATAA    |
| B14 | CAGGCAAGATAAAAATTTTAGAATATTCAAC             |
| B15 | GATTAGAGATTAGATACATTTCCGAAATCATA            |
| B16 | CGCCAAAAGGAATTACAGTCAGAAGCAAAGCGCAGGTCAG    |
| B17 | GCAAATATTTAAATTGAGATCTACAAAGGCTACTGATAAA    |
| B18 | TTAATGCCTTATTTCAACGCAAGGGCAAAGAA            |
| B19 | TTAGCAAATAGATTTAGTTTGACCAGTACCTT            |
| B20 | TAATTGCTTTACCCTGACTATTATGAGGCATAGTAAGAGC    |
| B21 | ATAAAGCCTTTGCGGGAGAAGCCTGGAGAGGGTAG         |
| B22 | TAAGAGGTCAATTCTGCGAACGAGATTAAGCA            |
| B23 | AACACTATCATAACCCATCAAAAATCAGGTCTCCTTTTGA    |
| B24 | ATGACCCTGTAATACTTCAGAGCA                    |
| B25 | TAAAGCTATATAACAGTTGATTCCCATTTTTG            |
| B26 | CGGATGGCACGAGAATGACCATAATCGTTTACCAGACGAC    |
| B27 | TAATTGCTTGGAAGTTTCATTCCAATCGGTTGTA          |

|     |                                              |
|-----|----------------------------------------------|
| B28 | GATAAAAACCAAAATATTAACAGTTCAGAAATTAGAGCT      |
| B29 | ACTAAAGTACGGTGTCTGAATATAA                    |
| B30 | TGCTGTAGATCCCCCTCAAATGCTGCGAGAGGCTTTTGCA     |
| B31 | AAAGAAGTTTTTGCCAGCATAAATATTCATTGACTCAACATGTT |
| B32 | AATACTGCGGAATCGTAGGGGGTAATAGTAAAATGTTTAGACT  |
| B33 | AGGGATAGCTCAGAGCCACCACCCCATGTCAA             |
| B34 | CAACAGTTTATGGGATTTTGCTAATCAAAGG              |
| B35 | GCCGCTTTGCTGAGGCTTGCAGGGGAAAAGGT             |
| B36 | GCGCAGACTCCATGTTACTTAGCCCGTTTTAA             |
| B37 | ACAGGTAGAAAGATTCATCAGTTGAGATTTAG             |
| B38 | CCTCAGAACCGCCACCCAAGCCCAATAGGAACGTAAATGA     |
| B39 | ATTTTCTGTCAGCGGAGTGAGAATACCGATAT             |
| B40 | ATTCGGTCTGCGGGATCGTCACCCGAAATCCG             |
| B41 | CGACCTGCGGTCAATCATAAGGGAACGGAACAACATTATT     |
| B42 | AGACGTTACCATGTACCGTAACACCCCTCAGAACCGCCAC     |
| B43 | CACGCATAAGAAAGGAACAATAAGTCTTTCC              |
| B44 | ATTGTGTCTCAGCAGCGAAAGACACCATCGCC             |
| B45 | TTAATAAACGAACTAACCGAACTGACCAACTCCTGATAA      |
| B46 | AGGTTTAGTACCGCCATGAGTTTCGTCACCAGGATCTAAA     |
| B47 | GTTTTGTCAGGAATTGCGAATAATCCGACAAT             |
| B48 | GACAACAAGCATCGGAACGAGGGTGAGATTTG             |
| B49 | TATCATCGTTGAAAGAGGACAGATGGAAGAAAAATCTACG     |
| B50 | AGCGTAACTACAACTACAACGCCTATCACCGTACTCAGG      |
| B51 | TAGTTGCGAATTTTTTTCACGTTGATCATAGTT            |
| B52 | GTACAACGAGCAACGGCTACAGAGGATACCGA             |
| B53 | ACCAGTCAGGACGTTGGAACGGTGTACAGACCGAAACAAA     |
| B54 | ACAGACAGCCCAAATCTCCAAAAAAAATTTCTTA           |
| B55 | AACAGCTTGCTTTGAGGACTAAAGCGATTATA             |
| B56 | CCAAGCGCAGGCGCATAGGCTGGCAGAACTGGCTCATTAT     |
| B57 | CGAGGTGAGGCTCCAAAAGGAGCC                     |
| B58 | ACCCCCAGACTTTTTTCATGAGGAACTTGCTTT            |
| B59 | ACCTTATGCGATTTTATGACCTTCATCAAGAGCATCTTTG     |
| B60 | CGGTTTATCAGGTTTCCATTAACGGGAATACACT           |
| B61 | AAAACACTTAATCTTGACAAGAATAATCATTGTGAATT       |
| B62 | GGCAAAAGTAAAATACGTAATGCC                     |
| B63 | TGGTTTAATTTCAACTCGGATATTCATTACCCACGAAAGA     |
| B64 | ACCAACCTAAAAAATCAACGTAACAAATAAATTGGGCTTGAGA  |
| B65 | CCTGACGAGAAACACCAGAACGAGTAGGCTGCTCATTTCAGTGA |
| C01 | TCGGGAGATATACAGTAACAGTACAAATAATT             |
| C02 | CCTGATTAAAGGAGCGGAATTATCTCGGCCTC             |
| C03 | GCAAATCACCTCAATCAATATCTGCAGGTCGA             |
| C04 | CGACCAGTACATTGGCAGATTCACCTGATTGC             |
| C05 | TGGCAATTTTAAACGTCAGATGAAAACAATAACGGATTTCG    |
| C06 | AAGGAATTACAAAGAAACCACCAGTCAGATGA             |
| C07 | GGACATTCACCTCAAATATCAAACACAGTTGA             |
| C08 | TTGACGAGCACGTATACTGAAATGGATTATTTAATAAAAAG    |
| C09 | CCTGATTGCTTTGAATTGCGTAGATTTTCAGGCATCAATA     |
| C10 | TAATCCTGATTATCATTTTGCGGAGAGGAAGG             |

|     |                                              |
|-----|----------------------------------------------|
| C11 | TTATCTAAAGCATCACCTTGCTGATGGCCAAC             |
| C12 | AGAGATAGTTTGACGCTCAATCGTACGTGCTTTCCTCGTT     |
| C13 | GATTATACACAGAAATAAAGAAATACCAAGTTACAAAATC     |
| C14 | TAGGAGCATAAAAGTTTGAGTAACATTGTTTG             |
| C15 | TGACCTGACAAATGAAAAATCTAAAATATCTT             |
| C16 | AGAATCAGAGCGGGAGATGGAAATACCTACATAACCCTTC     |
| C17 | GCGCAGAGGCGAATTAATTATTGACGTAAATTCTGAAT       |
| C18 | AATGGAAGCGAACGTTATTAATTTCTAACAAC             |
| C19 | TAATAGATCGCTGAGAGCCAGCAGAAGCGTAA             |
| C20 | GAATACGTAACAGGAAAAACGCTCCTAACAGGAGGCCGA      |
| C21 | TCAATAGATATTAATCCTTTGCCGGTTAGAACCT           |
| C22 | CAATATTTGCCTGCAACAGTGCCATAGAGCCG             |
| C23 | TTAAAGGGATTTTAGATACCGCCAGCCATTGCGGCACAGA     |
| C24 | ACAATTCGACAACTCGTAATACAT                     |
| C25 | TTGAGGATGGTCAGTATTAACACCTTGAATGG             |
| C26 | CTATTAGTATATCCAGAACAATATCAGGAACGGTACGCCA     |
| C27 | CGCGAACTAAAACAGAGGTGAGGCTTAGAAGTATT          |
| C28 | GAATCCTGAGAAGTGTATCGGCCTTGCTGGTACTTTAATG     |
| C29 | ACCACCAGCAGAAGATGATAGCCC                     |
| C30 | TAAAACATTAGAAGAACTCAAACTTTTTATAATCAGTGAG     |
| C31 | GCCACCGAGTAAAAGAACATCACTTGCCTGAGCGCCATTA AAA |
| C32 | TCTTTGATTAGTAATAGTCTGTCCATCACGCAAATTAACCGTT  |
| C33 | CGCGTCTGATAGGAACGCCATCAACTTTTACA             |
| C34 | AGGAAGATGGGGACGACGACAGTAATCATATT             |
| C35 | CTCTAGAGCAAGCTTGCATGCCTGGTCAGTTG             |
| C36 | CCTTCACCGTGAGACGGGCAACAGCAGTCACA             |
| C37 | CGAGAAAGGAAGGGAAGCGTACTATGGTTGCT             |
| C38 | GCTCATTTTTTAACCAGCCTTCCTGTAGCCAGGCATCTGC     |
| C39 | CAGTTTGACGCACTCCAGCCAGCTAAACGACG             |
| C40 | GCCAGTGCGATCCCCGGGTACCGAGTTTTTCT             |
| C41 | TTTACCAGCCTGGCCCTGAGAGAAAGCCGGCGAACGTGG      |
| C42 | GTAACCGTCTTTCATCAACATTA AAAATTTTTGTAAATCA    |
| C43 | ACGTTGTATTCCGGCACCGCTTCTGGCGCATC             |
| C44 | CCAGGGTGGCTCGAATTCGTAATCCAGTCACG             |
| C45 | TAGAGCTTGACGGGGAGTTGCAGCAAGCGGTCATTGGGCG     |
| C46 | GTTAAAATTCGCATTAATGTGAGCGAGTAACACACGTTGG     |
| C47 | TGTAGATGGGTGCCGAAACCAGGAACGCCAG              |
| C48 | GGTTTTCCATGGTCATAGCTGTTTGAGAGGCG             |
| C49 | GTTTTCGTCACGCTGGTTTGCCCCAAGGGAGCCCCCGATT     |
| C50 | GGATAGGTACCCGTCGGATTCTCCTAAACGTTAATATTTT     |
| C51 | AGTTGGGTCAAAGCGCCATTCGCCCCGTAATG             |
| C52 | CGCGCGGGCCTGTGTGAAATTGTTGGCGATTA             |
| C53 | CTAAATCGGAACCCTAAGCAGGCGAAAATCCTTCGGCCAA     |
| C54 | CGGCGGATTGAATTCAGGCTGCGCAACGGGGGATG          |
| C55 | TGCTGCAAATCCGCTCACAATCCCAGCTGCA              |
| C56 | TTAATGAAGTTTGATGGTGGTTCCGAGGTGCCGTAAAGCA     |
| C57 | TGGCGAAATGTTGGGAAGGGCGAT                     |
| C58 | TGTCGTGCACACAACATACGAGCCACGCCAGC             |

|          |                                             |
|----------|---------------------------------------------|
| C59      | CAAGTTTTTTGGGGTTCGAAATCGGCAAATCCGGGAAACC    |
| C60      | TCTTCGCTATTGGAAGCATAAAGTGTATGCCCGCT         |
| C61      | TTCCAGTCCTTATAAATCAAAGAGAACCATCACCCAAAT     |
| C62      | GCGCTCACAAGCCTGGGGTGCCTA                    |
| C63      | CGATGGCCCACTACGTATAGCCCGAGATAGGGATTGCGTT    |
| C64      | AACTCACATTATTGAGTGTGTTCCAGAAACCGTCTATCAGGG  |
| C65      | ACGTGGACTCCAACGTCAAAGGGCGAATTTGGAACAAGAGTCC |
| Link-A1C | TTAATTAATTTTTTACCATATCAA                    |
| Link-A2C | TTAATTTTCATCTTAGACTTTACAA                   |
| Link-A3C | CTGTCCAGACGTATACCGAACGA                     |
| Link-A4C | TCAAGATTAGTGTAGCAATACT                      |
| Link-B1A | TGTAGCATTCCTTTTATAAACAGTT                   |
| Link-B2A | TTAATTGTATTTCCACCAGAGCC                     |
| Link-B3A | ACTACGAAGGCTTAGCACCATTA                     |
| Link-B4A | ATAAGGCTTGCAACAAAGTTAC                      |
| Link-C1B | GTGGGAACAAATTTCTATTTTTGAG                   |
| Link-C2B | CGGTGCGGGCCTTCCAAAACATT                     |
| Link-C3B | ATGAGTGAGCTTTTAAATATGCA                     |
| Link-C4B | ACTATTAAGAGGATAGCGTCC                       |
| Loop     | GCGCTTAATGCGCCGCTACAGGGC                    |

## 2. Sequences for AuNPs complementary

|                |                                                                             |
|----------------|-----------------------------------------------------------------------------|
| A48-sticky end | AAAAAAAAAAAAAAAAAAAAAAAAATTTTCACCGGAATCGCCAT<br>A TTTAACAAAATTTACG          |
| A49-sticky end | AAAAAAAAAAAAAAAAAAAAAAAAATTTTAGCATGTATTTTCATC<br>GT AGGAATCAAACGATTTTTTGTTT |
| A56-sticky end | AAAAAAAAAAAAAAAAAAAAAAAAATTTTACAAGAAAGCAAGC<br>A AATCAGATAACAGCCATATTATTA   |
| Thiol ssDNA    | TTTTTTTTTTTTTTTTTTTTTTTTTTT-SH                                              |

## 3. Sequences for QDs streptavidin conjunction

|                |                                                                |
|----------------|----------------------------------------------------------------|
| B32-sticky end | AATACTGCGGAATCGTAGGGGTAATAGTAAAATGTTTAGACTA<br>GTTGTGGATCCTACT |
| Biotin ssDNA   | Biotin-AGTAGGATCCCAACT                                         |

## 4. Sequences for amino anchors

|          |                                                                        |
|----------|------------------------------------------------------------------------|
| A5-Amino | TTTGATGATTAAGAGGCTGAGACTTGCTCAGTACCAGGCGCCGA<br>TTCAG-NH <sub>2</sub>  |
| B5-Amino | ACAGTCAAAGAGAATCGATGAACGACCCCGGTTGATAATCCCG<br>ATTCAG-NH <sub>2</sub>  |
| C5-Amino | TGGCAATTTTAAACGTCAAGATGAAAACAATAACGGATTCGCCGA<br>TTCAG-NH <sub>2</sub> |

|           |                                                                        |
|-----------|------------------------------------------------------------------------|
| A13-Amino | TTTAACGGTTCGGAACCTATTATTAGGGTTGATATAAGTACCGAT<br>TTCAG-NH <sub>2</sub> |
| B13-Amino | CGTTCTAGTCAGGTCATTGCCTGACAGGAAGATTGTATAACCGA<br>TTCAG-NH <sub>2</sub>  |
| C13-Amino | GATTATACACAGAAATAAAGAAATACCAAGTTACAAAATCCCGA<br>TTCAG-NH <sub>2</sub>  |
| A33-Amino | CGCGTCTGATAGGAACGCCATCAACTTTTACACCGATTCAG-NH <sub>2</sub>              |
| B33-Amino | AGGGATAGCTCAGAGCCACCACCCCATGTCAACCGATTCAG-<br>NH <sub>2</sub>          |
| C33-Amino | GATTATACACAGAAATAAAGAAATACCAAGTTCCGATTCAG-NH <sub>2</sub>              |
| A42-Amino | AGAGTCAAAAATCAATATATGTGATGAAACAAACATCAAGCCGA<br>TTCAG-NH <sub>2</sub>  |
| B42-Amino | AGACGTTACCATGTACCGTAACACCCCTCAGAACCGCCACCCGA<br>TTCAG-NH <sub>2</sub>  |
| C42-Amino | GTAACCGTCTTTCATCAACATTAATAATTTTGTAAATCACCGAT<br>TTCAG-NH <sub>2</sub>  |
| A50-Amino | ACATAGCGCTGTAAATCGTCGCTATTCATTTCAATTACCTCCGATT<br>CAG-NH <sub>2</sub>  |
| B50-Amino | AGCGTAACTACAACTACAACGCCTATCACCGTACTCAGGCCGA<br>TTCAG-NH <sub>2</sub>   |
| C50-Amino | GGATAGGTACCCGTCGGATTCTCCTAAACGTTAATATTTTCCGAT<br>TTCAG-NH <sub>2</sub> |

## Supplementary figures

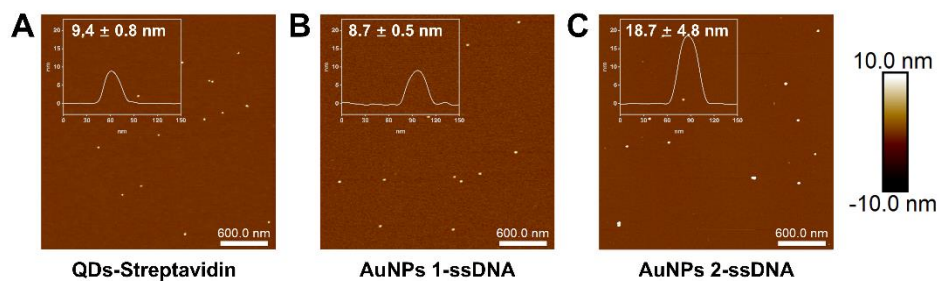

**Figure S1.** AFM images of different functionalised nanoparticles. A) The size of streptavidin modified QDs are around  $9.4 \pm 0.8$  nm; B) the size of ssDNA conjugated AuNPs 1 are around  $8.7 \pm 0.5$  nm; C) the size of ssDNA conjugated AuNPs 2 are around  $18.7 \pm 4.8$  nm.

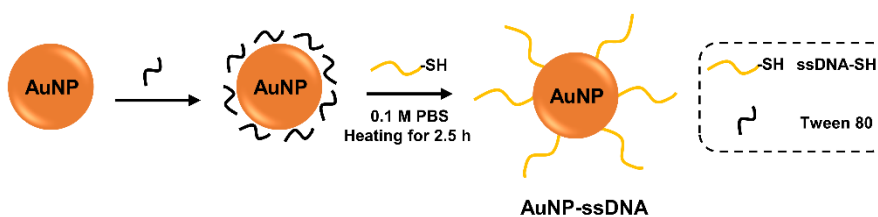

**Figure S2.** Schematic of Tween 80 mediated thiol-ssDNA (ssDNA-SH) and AuNPs conjugation.



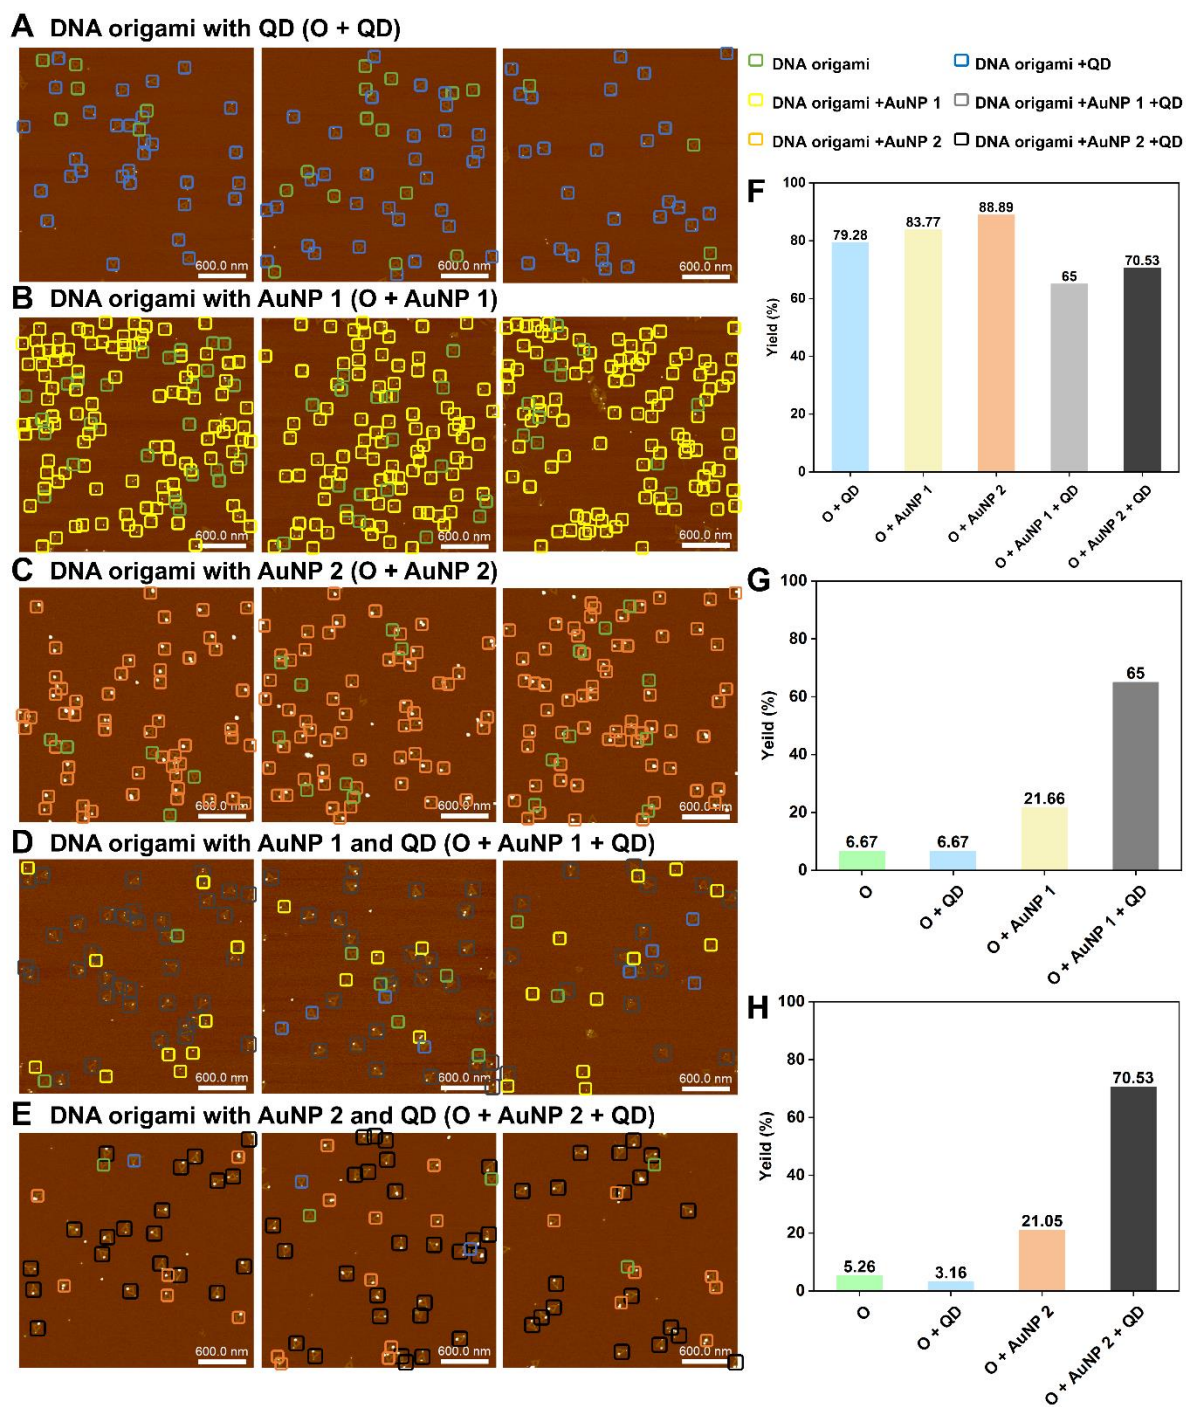

**Figure S3.** Analysis of the yields of DNA origami functionalization with multiple nanoparticles. A)-E) Select three different area via AFM and counting numbers of each functionalisation DNA origami; F) analysis of the yields of each functionalisation DNA origami; G) analysis of the yield of DNA origami with AuNP 1 and QD; H) analysis of the yield of DNA origami with AuNP 2 and QD.

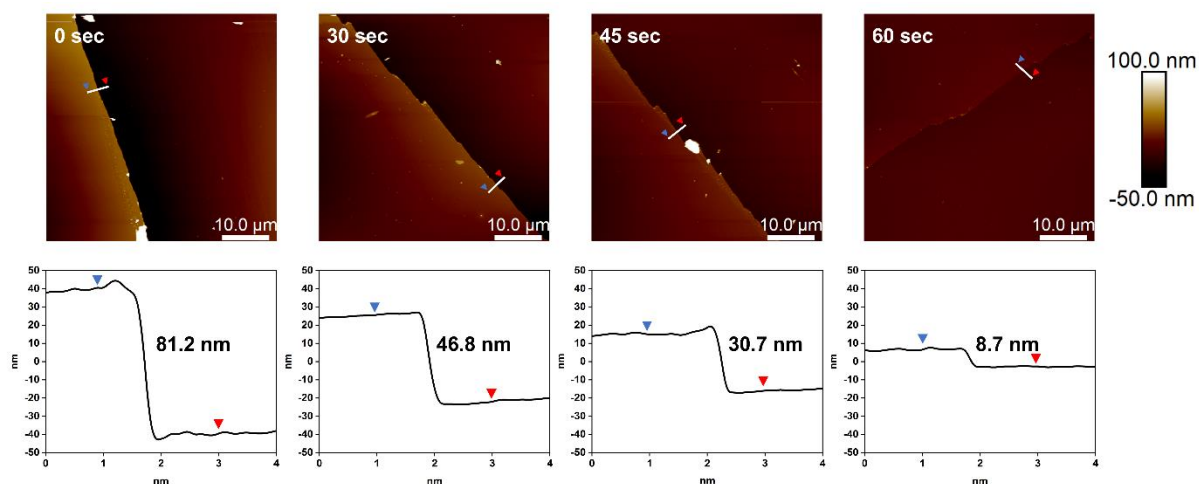

**Figure S4.** AFM images of the correlation between PPA thickness and the increase of oxygen plasma time. The thickness of PPA decreases by about 1.2 nm per seconds.

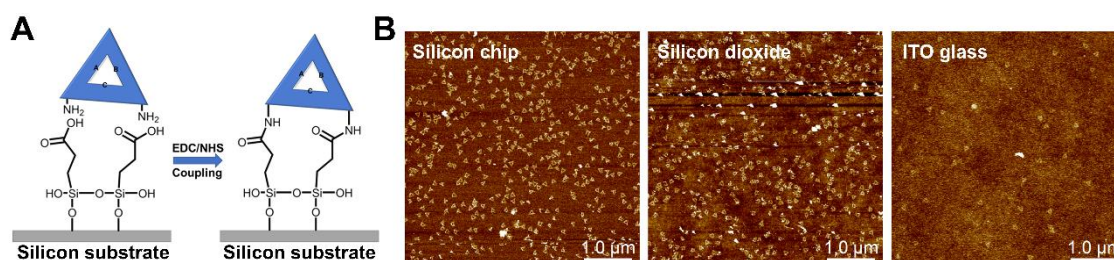

**Figure S5.** Schematic and validation of amino-functionalised DNA origami. A) Reactions of carboxylic silanisation on the substrate for coupling with amino-anchors of DNA origami; B) the DNA origami placement process can work in different substrates (silicon, silicon dioxide and ITO glass).

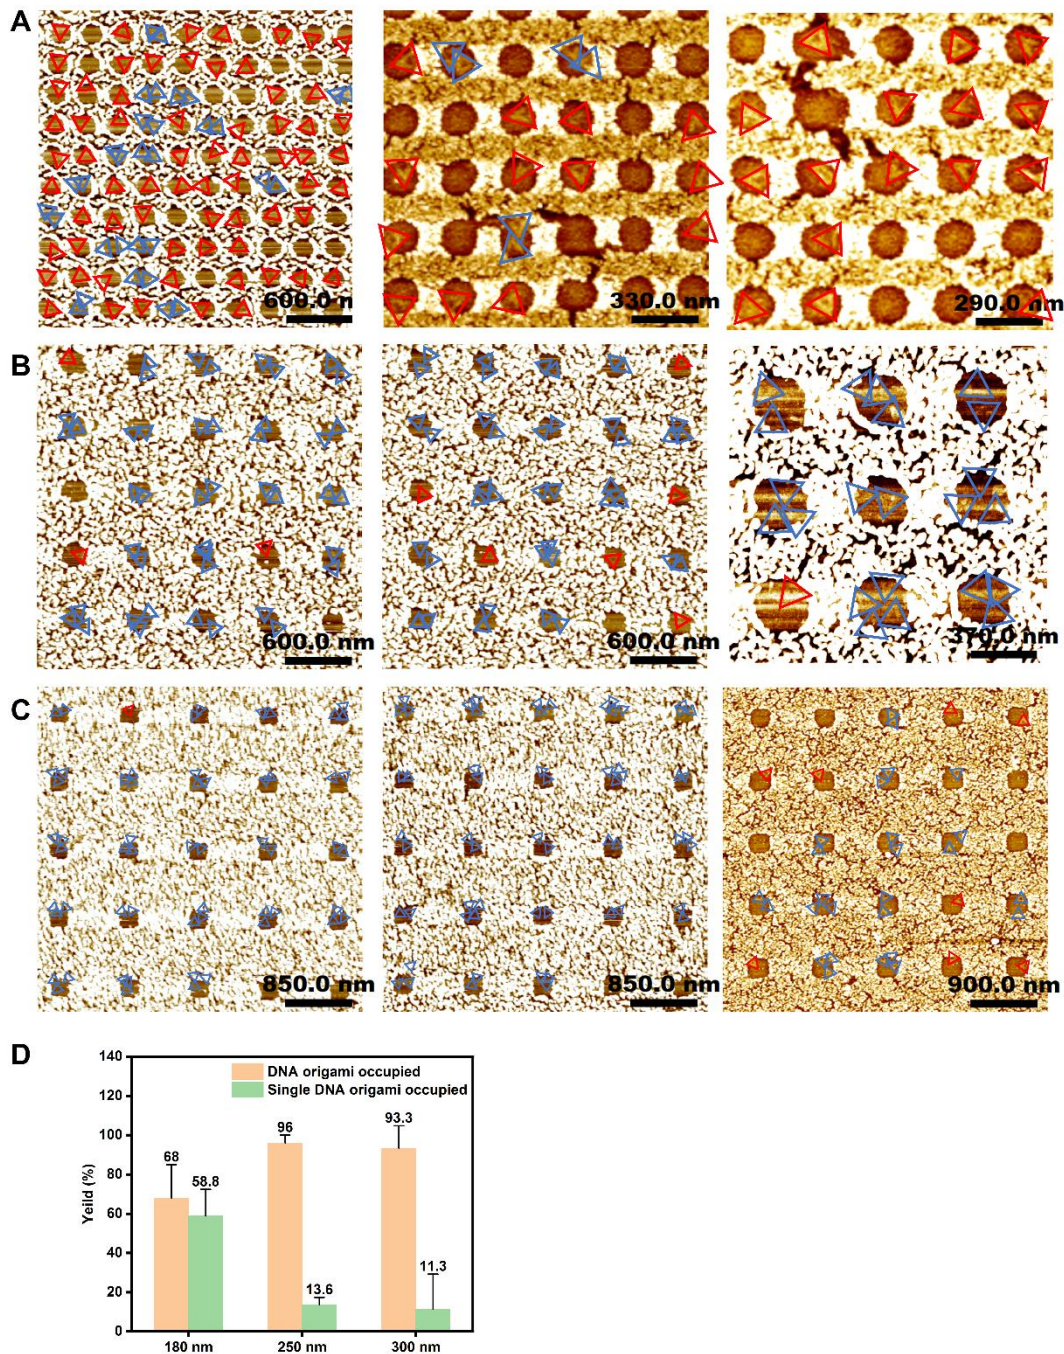

**Figure S6.** Topographical AFM image of DNA origami immobilised in A) 180 nm nanoapertures, B) 250 nm nanoapertures, and C) 300 nm nanoapertures. Red triangle frames show single DNA origami occupied; blue triangle frames indicate multiple DNA origami occupied. D) analysis of DNA origami immobilization yields shows  $68\% \pm 17\%$  ( $58.8\% \pm 13.6\%$  single occupancy),  $96\% \pm 4\%$  ( $13.6\% \pm 3.8\%$  single occupancy), and  $93.3\% \pm 11.5\%$  ( $11.3\% \pm 17.9\%$  single occupancy) for the 180 nm, 250 nm and 300 nm nanoapertures, respectively.

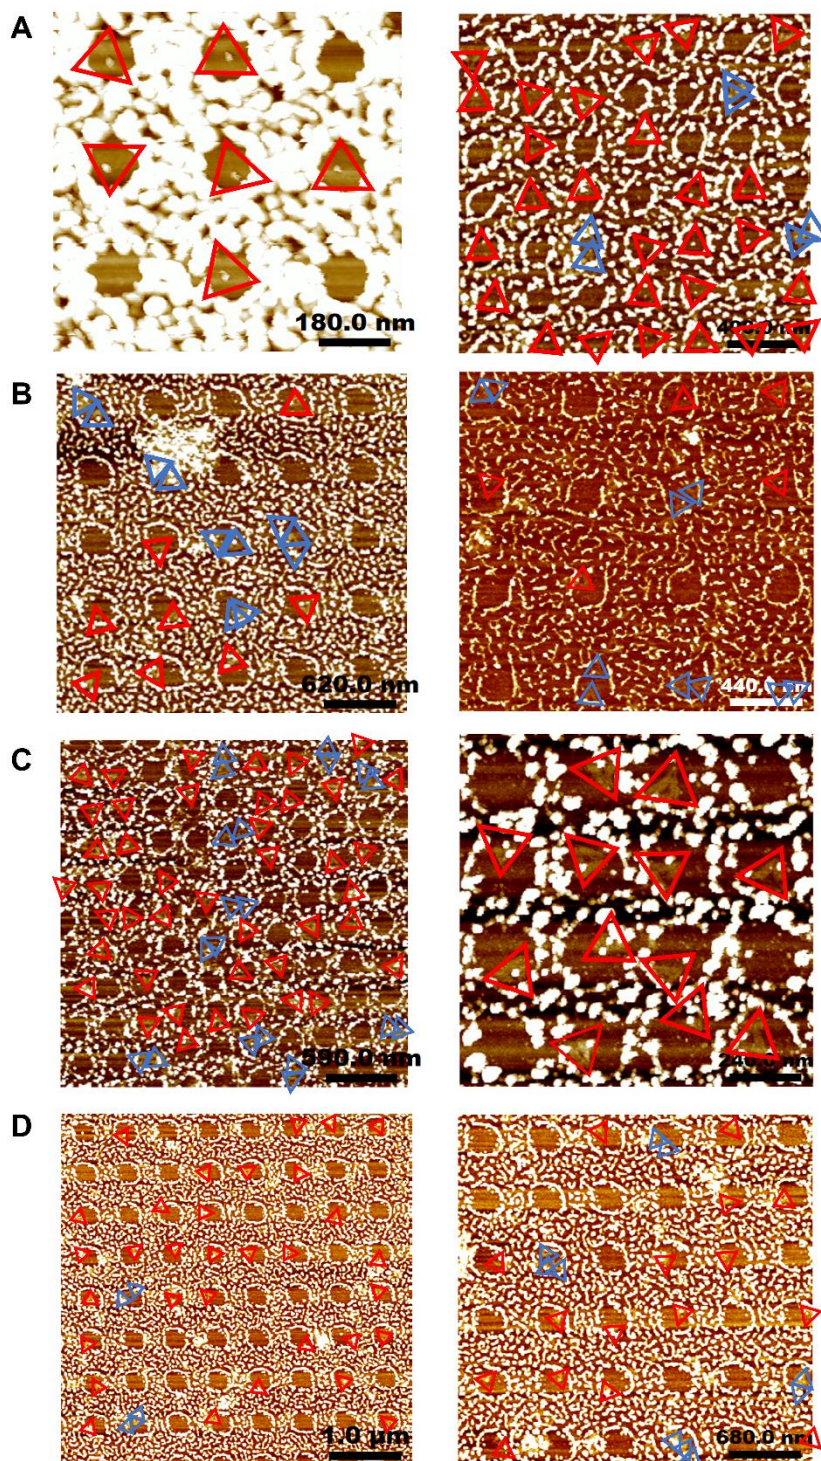

**Figure S7.** AFM topographical images of multiple nanoparticle-functionalised DNA origami. DNA origami with AuNP 1 in A) 180 nm nanoapertures and B) 250 nm nanoapertures; DNA origami with AuNP 1 and QD immobilised in C) 180 nm nanoapertures and D) 250 nm nanoapertures. Red triangle frames show single DNA origami occupied; blue triangle frames indicate multiple DNA origami occupied.
